# Supplementary material
Source: PubMed Central journal article supplement (PMC2632340)
Supplement: NIHMS87078-supplement-01.pdf [file NIHMS87078-supplement-01.pdf]

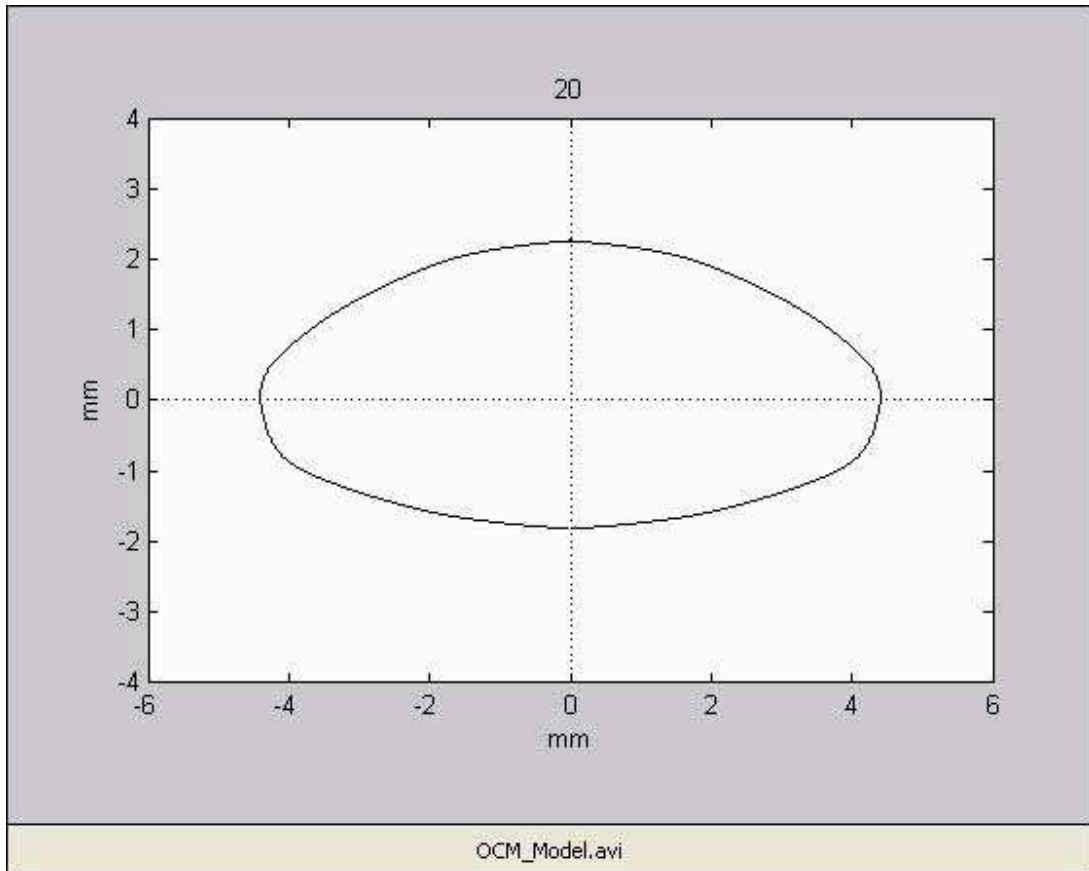

**Movie 1:** Growth of the human crystalline lens from age 20 to 82 years predicted by the OCM Model.

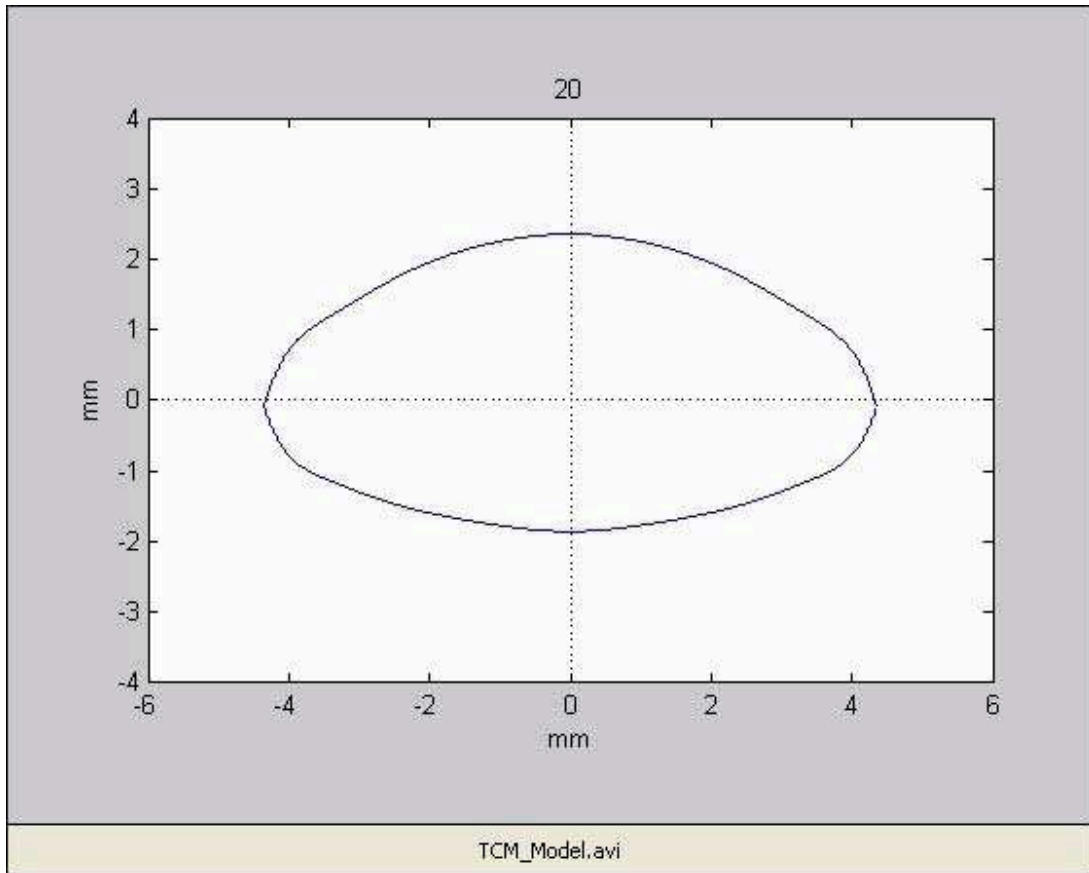

**Movie 2:** Growth of the human crystalline lens from age 20 to 60 years as predicted by the TCM Model.
